# Supplementary material for: Preparation of Multicolor Photoluminescent Carbon Dots by Tuning Surface States
Source: PubMed Central journal article supplement (PMC6523770; doi:10.3390/nano9040529), 2019-04-03
Supplement: nanomaterials-09-00529-s001.pdf [file nanomaterials-09-00529-s001.pdf]

# Supplementary Materials

## Preparation of Multicolor Photoluminescent Carbon Dots by Tuning Surface States

Kai Jiang <sup>1,2</sup>, Xiangyu Feng <sup>2</sup>, Xiaolu Gao <sup>2</sup>, Yuhui Wang <sup>2</sup>, Congzhong Cai <sup>1</sup>, Zhongjun Li <sup>3</sup> and Hengwei Lin <sup>2,\*</sup>

<sup>1</sup> State Key Laboratory of Coal Mine Disaster Dynamics and Control, Department of Applied Physics, Chongqing University, Chongqing 400044, China; jiangkai@nimte.ac.cn (K.J.); czcai@cqu.edu.cn (C.C.)

<sup>2</sup> Key Laboratory of Graphene Technologies and Applications of Zhejiang Province & Ningbo Institute of Materials Technology & Engineering (NIMTE), Chinese Academy of Sciences (CAS), Ningbo 315201, China; fengxiangyu@nimte.ac.cn (X.F.); gaoxiaolu@nimte.ac.cn (X.G.); wangyuhui@nimte.ac.cn (Y.W.)

<sup>3</sup> College of Chemistry and Molecular Engineering, Zhengzhou University, Zhengzhou 450001 China; lizhongjun@zzu.edu.cn

\* Correspondence: linhengwei@nimte.ac.cn; Tel.: +86-574-8668-5130

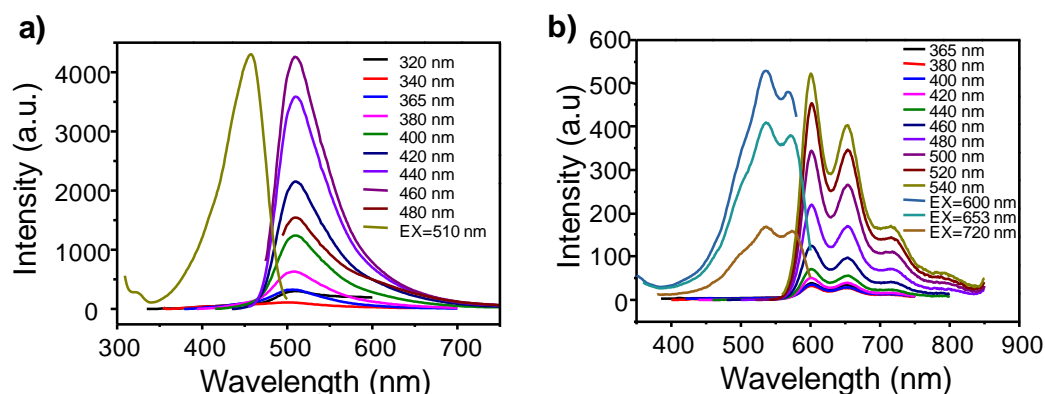

**Figure S1** a) PL emission spectra of the g-CDs ethanol dispersion under different excitation wavelengths and PL excitation spectrum at emission wavelength of 510 nm; b) PL emission spectra of the r-CDs ethanol dispersion under different excitation wavelengths and PL excitation spectra at emission wavelengths of 600, 653 and 720 nm.

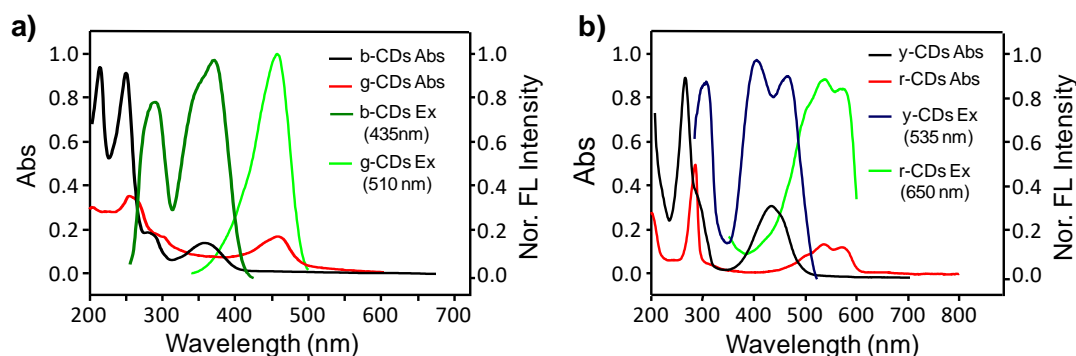

**Figure S2** a) UV-Vis absorption and PL excitation spectra of b-CDs and g-CDs (excitation wavelengths at 435 and 510 nm, respectively); b) UV-Vis absorption and PL excitation spectra of y-CDs and r-CDs (excitation wavelengths at 535 and 650 nm, respectively).

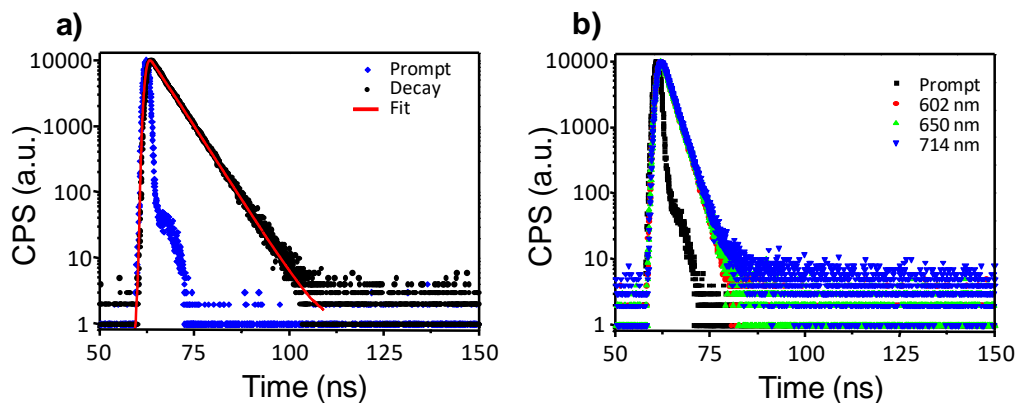

**Figure S3** a) PL decay spectra of the g-CDs ethanol dispersion monitored at 510 nm under excitation of 457 nm; b) PL decay spectra of the r-CDs ethanol dispersion monitored at 602, 650 and 714 nm under excitation of 588 nm.

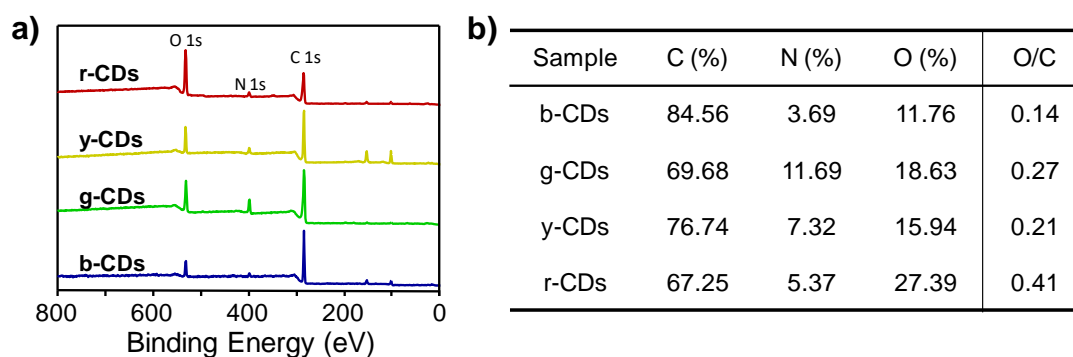

**Figure S4** a) XPS survey of the b-CDs, g-CDs, y-CDs, and r-CDs; b) Relative contents of C, N, and O elements of these CDs based XPS data.

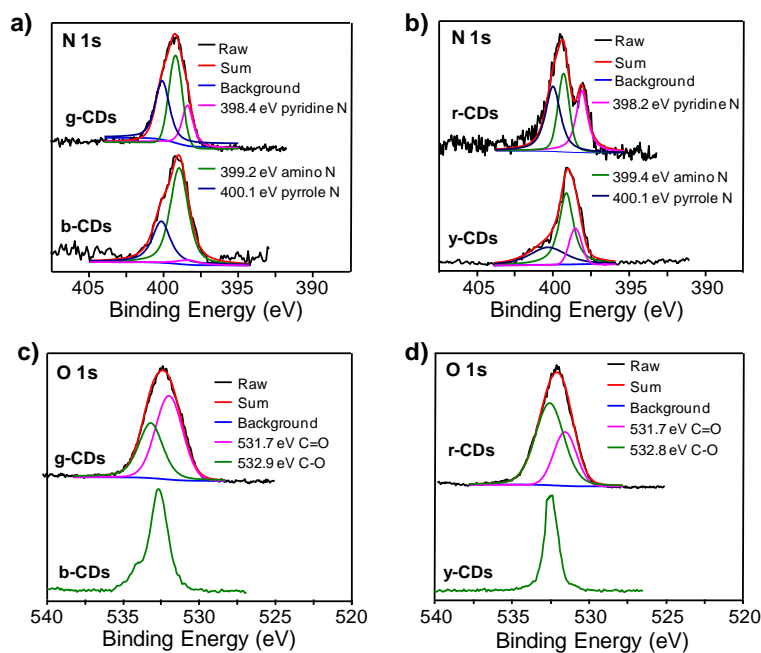

**Figure S5** a-b) high resolution XPS N 1s spectra of g-CDs and r-CDs and their comparison to b-CDs and y-CDs, respectively; c-d) high resolution XPS O 1s spectra of g-CDs and r-CDs and their comparison to b-CDs and y-CDs, respectively.

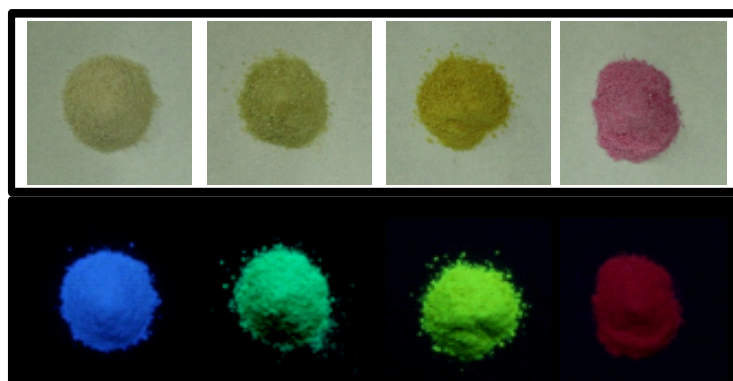

**Figure S6** Photographs of the b-CDs@PVP, g-CDs@PVP, y-CDs@PVP, and r-CDs@PVP powders (from left to right) under daylight and UV light (365 nm).

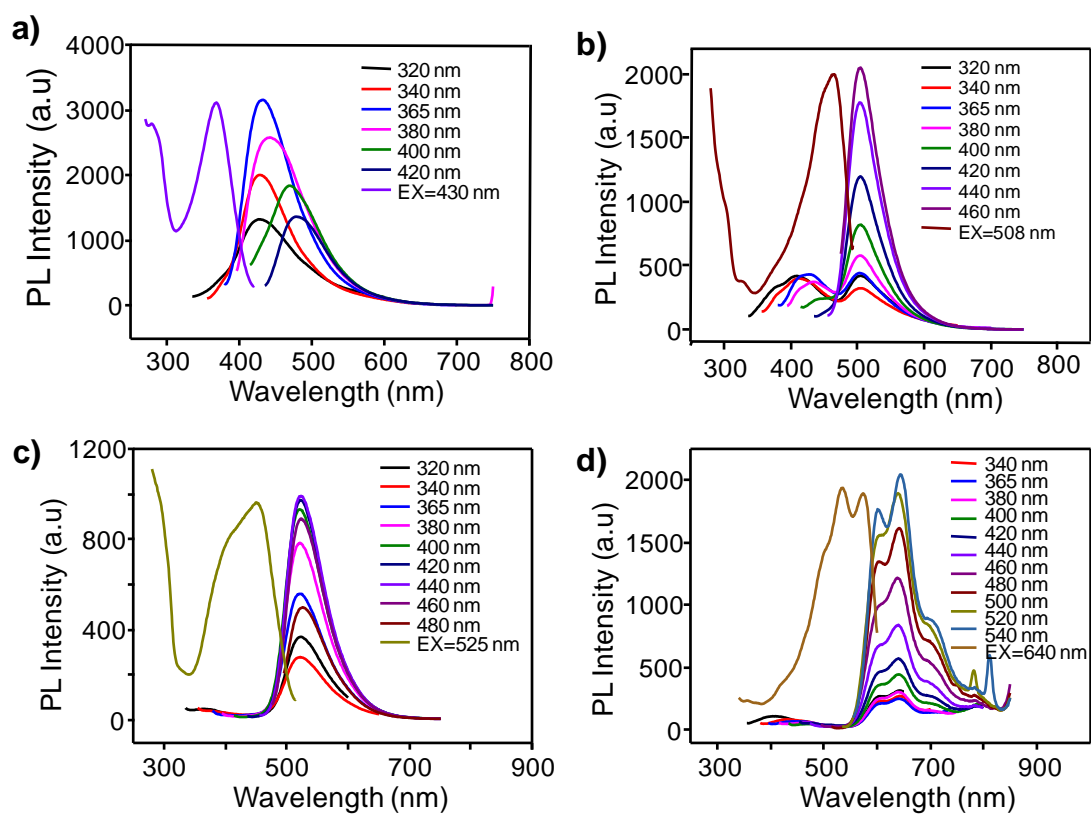

**Figure S7** PL emission spectra under different wavelengths and excitation spectra at the corresponding emission maxima of b-CDs@PVP (a), g-CDs@PVP (b), y-CDs@PVP (c), and r-CDs@PVP (d) powders.

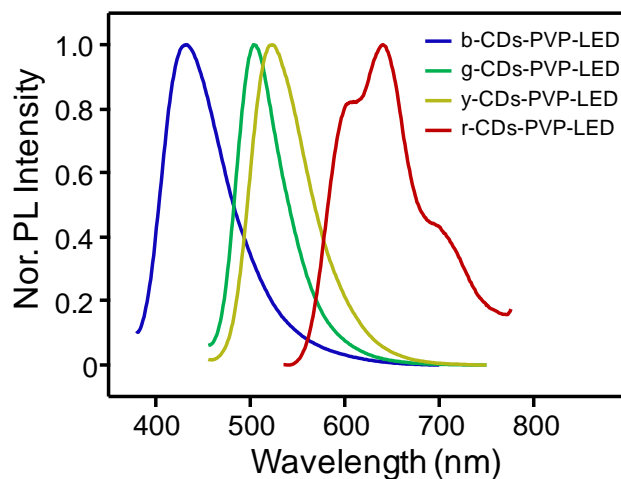

**Figure S8** Corresponding emission spectra of the multicolour LEDs.

**Table S1.** QYs of the g-CDs and r-CDs in ethanol.

| Sample       | $\lambda_{ex}(nm)$ | $\Phi_1(\%)$ | $\Phi_2(\%)$ | $\Phi_3(\%)$ | $\Phi_4(\%)$ | $\Phi_5(\%)$ | $\Phi_{avg}(\%)$ | $\Phi_{corr}(\%)$ |
|--------------|--------------------|--------------|--------------|--------------|--------------|--------------|------------------|-------------------|
| <b>R-6G</b>  | 488                | 93.45        | 94.33        | 93.18        | 94.02        | 94.27        | 93.85            | <b>95</b>         |
| <b>g-CDs</b> | 440                | 28.21        | 28.02        | 27.91        | 27.75        | 27.50        | 27.88            | <b>28.22</b>      |
| <b>r-CDs</b> | 540                | 21.09        | 23.74        | 21.47        | 21.14        | 21.30        | 21.75            | <b>22.01</b>      |

**Table S2.** Fitted parameters of the PL decay spectra of the g-CDs and r-CDs.

| Sample       | $\lambda_{ex}(nm)$ | $\lambda_{em}(nm)$ | $\tau_1(ns)$ | $B_1(\%)$ | $\phi$ |
|--------------|--------------------|--------------------|--------------|-----------|--------|
| <b>g-CDs</b> | 457                | 510                | 4.86         | 100       | 1.067  |
| <b>r-CDs</b> | 588                | 608                | 2.18         | 100       | 1.096  |
| <b>r-CDs</b> | 588                | 650                | 2.20         | 100       | 1.133  |
| <b>r-CDs</b> | 588                | 714                | 2.24         | 100       | 1.057  |

**Table S3.** PL QYs of the b-CDs@PVP, g-CDs@PVP, y-CDs@PVP and r-CDs@PVP powders.

| Sample           | $\lambda_{ex}(nm)$ | $\Phi_1$ | $\Phi_2$ | $\Phi_3$ | $\Phi_4$ | $\Phi_5$ | $\Phi_{avg}$ |
|------------------|--------------------|----------|----------|----------|----------|----------|--------------|
| <b>b-CDs-PVP</b> | 360                | 9.42     | 8.86     | 9.01     | 8.04     | 8.77     | <b>8.82</b>  |
| <b>g-CDs-PVP</b> | 450                | 15.36    | 14.93    | 14.74    | 14.03    | 13.50    | <b>14.44</b> |
| <b>y-CDs-PVP</b> | 430                | 16.19    | 16.06    | 16.25    | 15.97    | 16.18    | <b>16.13</b> |
| <b>r-CDs-PVP</b> | 540                | 15.74    | 14.94    | 14.78    | 14.39    | 14.20    | <b>14.81</b> |
